# Supplementary material
Source: publisher site journal article supplement (https://www.dovepress.com/article/364270)

Figure S1：The details of Affiliated Hospital of Hangzhou Normal University and specific air quality monitoring stations


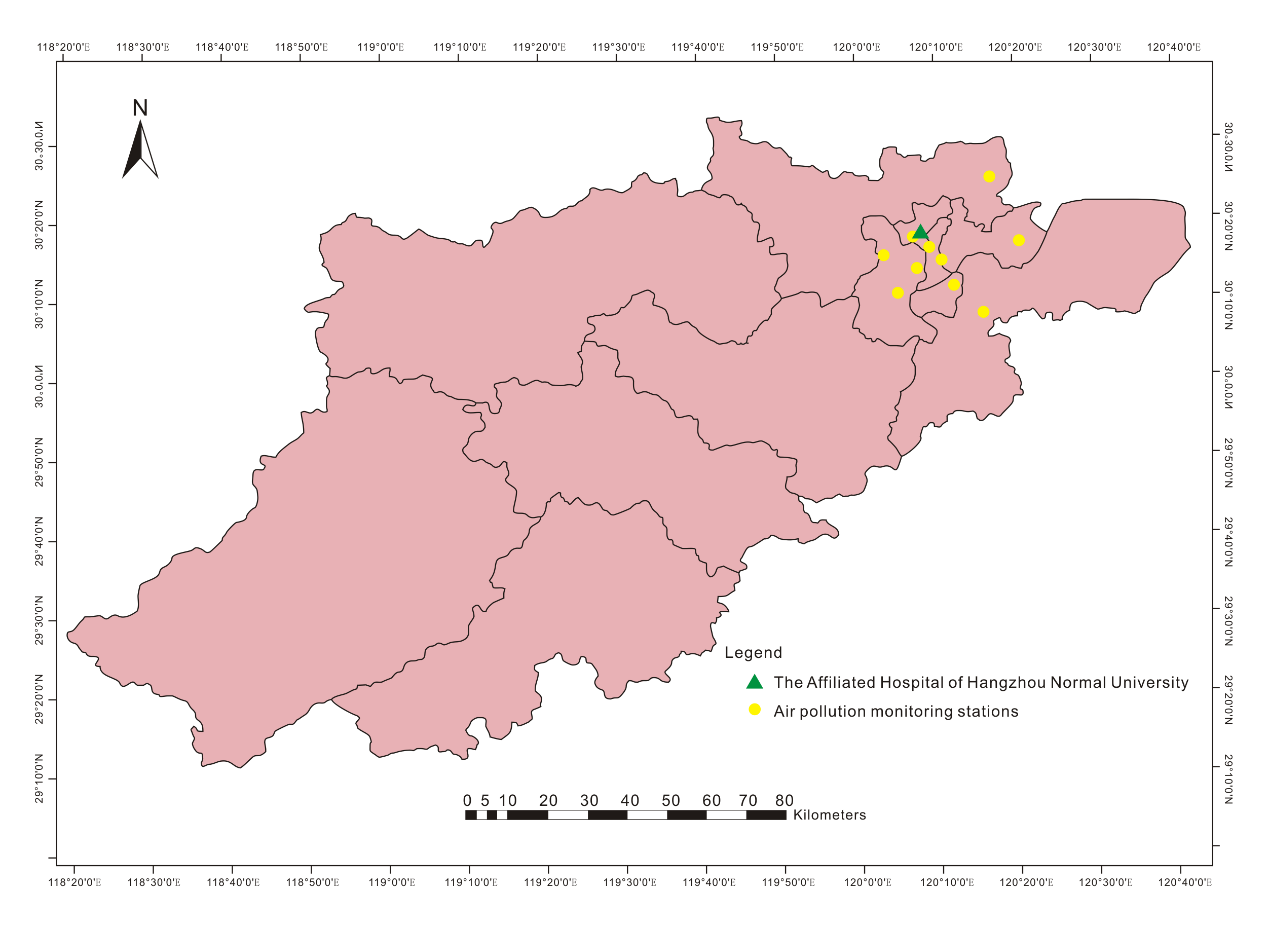

Supplement: Supplementary file 1 [file get_supplementary_file.php]
